# Supplementary material
Source: PubMed Central journal article supplement (PMC2909366)
Supplement: NIHMS197808-supplement-1.pdf [file NIHMS197808-supplement-1.pdf]

**Supplementary Material for**  
**Structural features promoting dioxygen production by *Dechloromonas***  
***aromatica* chlorite dismutase**

**Brandon R. Goblirsch, Bennett R. Streit, Jennifer L. Dubois, and Carrie M. Wilmot**

B.R. Goblirsch, C.M. Wilmot (✉)

Department of Biochemistry, Molecular Biology and Biophysics,

University of Minnesota,

Minneapolis,

Minnesota 55455, USA.

Fax: +1-612-624-5121

e-mail: [wilmo004@umn.edu](mailto:wilmo004@umn.edu)

B.R. Streit, J.L. Dubois

Department of Chemistry and Biochemistry

University of Notre Dame,

Notre Dame,

Indiana 46556, USA.

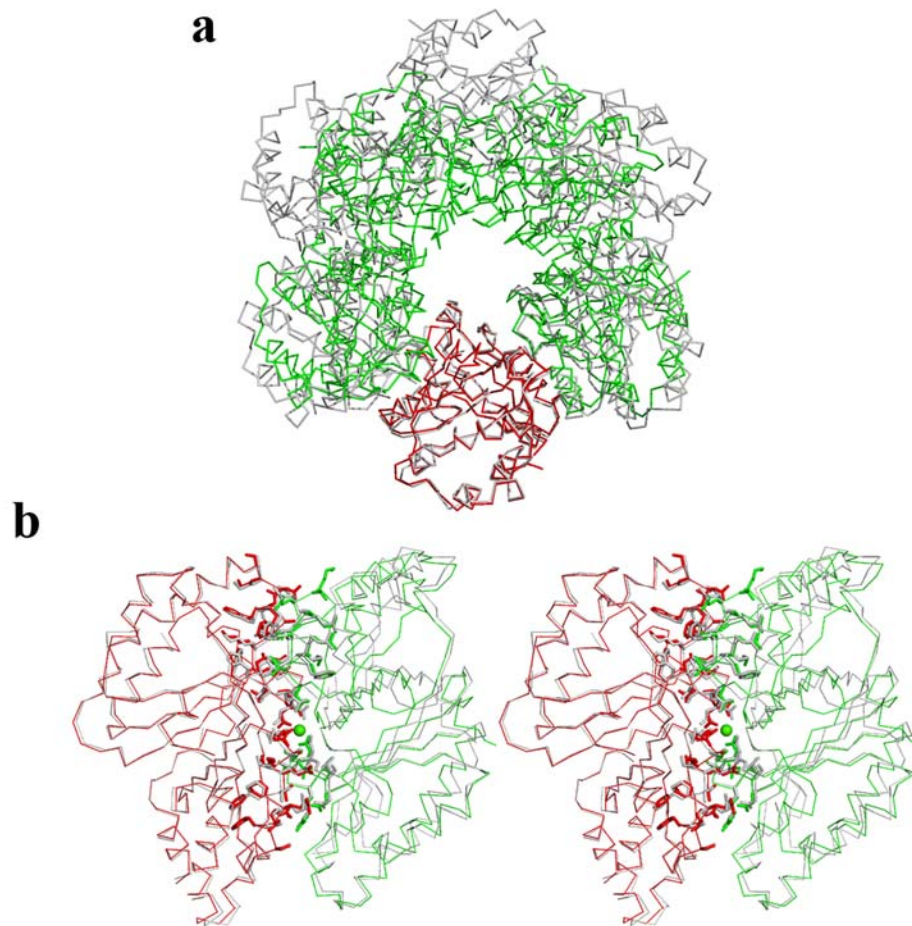

**Fig. S1.** Overlay of *D. aromatica* chlorite dismutase and *A. oryzae* chlorite dismutase (PDB entry: 2vdx). The *D. aromatica* pentamer is drawn as a green and red colored  $\text{Ca}\alpha$  trace and the *A. oryzae* hexamer as a grey  $\text{Ca}\alpha$  trace. The Figure was generated by overlaying the red *D. aromatica* monomer onto an *A. oryzae* monomer. **(a)** Superimposition of *D. aromatica* chlorite dismutase pentamer on *A. oryzae* chlorite dismutase hexamer. **(b)** Stereo representation of the chlorite dismutase monomer/monomer interface. The calcium ion found in *D. aromatica* chlorite dismutase is shown as a green sphere. This figure was generated using PyMOL (<http://www.pymol.org/>).

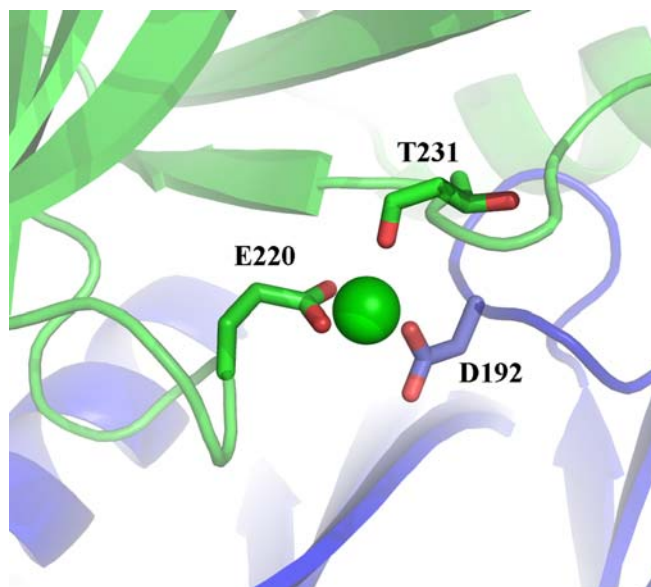

**Fig. S2.** Calcium binding site at the monomer/monomer interface of the chlorite dismutase pentamer. The two monomers are shown as green and blue cartoon respectively, and the calcium ion is shown as a green sphere. This figure was generated using PyMOL (<http://www.pymol.org/>).

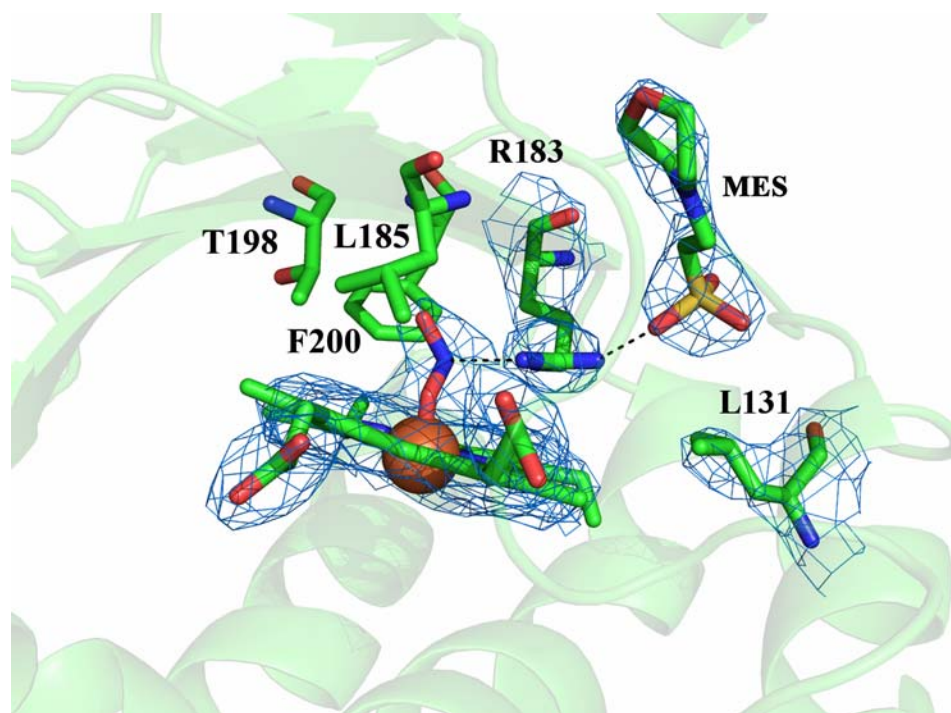

**Fig. S3.** Molecule of MES buffer bound close to the chlorite dismutase active site at pH=6.5. Electron density shown in blue is 20-fold NCS averaged 2Fo-Fc maps contoured at 3  $\sigma$ . The heme, MES, nitrite and residues are drawn as stick colored by atom (carbon, green), with the Fe as an orange sphere. This figure was generated using PyMOL (<http://www.pymol.org/>).

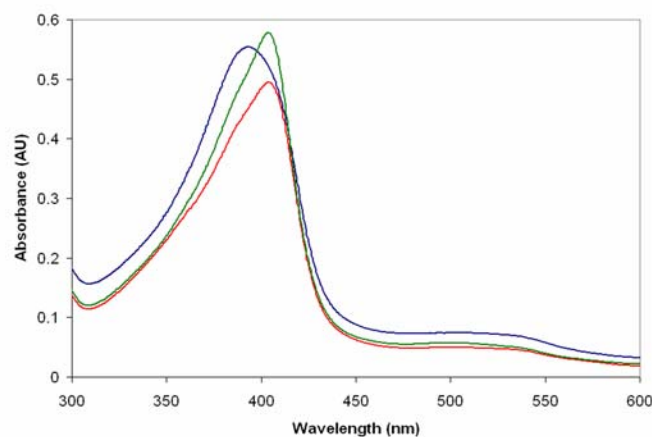

**Fig. S4.** UV-visible absorbance spectra of nitrite and acetate binding to chlorite dismutase. Ligand concentrations are equivalent to those in the crystallization; nitrite 47-fold excess per active site, and acetate 373-fold excess per active site. Spectra are colored as follows; chlorite dismutase alone, blue ( $\lambda_{\text{max}} = 392$  nm); chlorite dismutase + nitrite, red ( $\lambda_{\text{max}} = 405$  nm); chlorite dismutase + acetate, green ( $\lambda_{\text{max}} = 404$  nm).

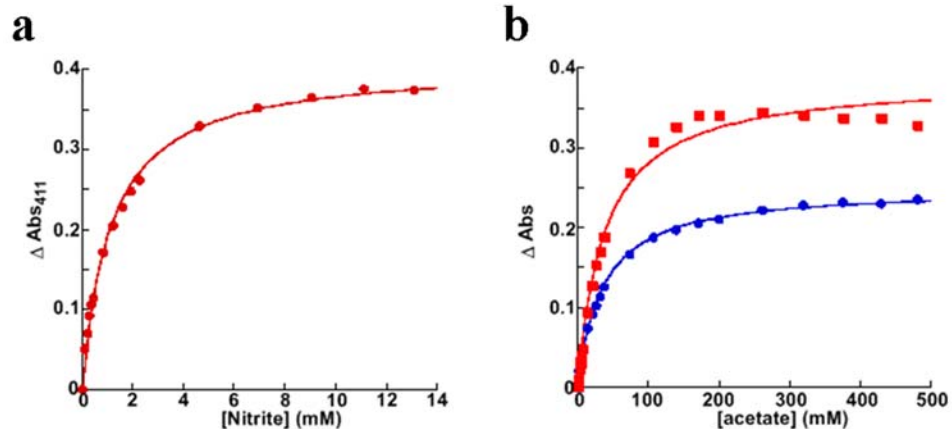

**Fig. S5.** Nitrite and acetate binding curves to Cld at pH 6.5. **(a)** Change of the absorbance at 411 nm as a function of nitrite added. The data were fit to the equation described in Materials and Methods, and yield a apparent  $K_d$  value of  $1120 \pm 50 \mu\text{M}$ . **(b)** Change in absorbance at 407 nm (red) or 381 nm (blue) as a function of acetate added. A fit of the data to the equation described in Materials and Methods yields an apparent  $K_d$  value of  $38 \pm 3 \text{ mM}$  (407 nm) or  $35 \pm 1 \text{ mM}$  (381 nm).
